# Supplementary material for: Large Au@Pd/PdOx core–porous shell nanoparticles as efficient ethanol oxidation electrocatalysts
Source: Royal Society of Chemistry journal article supplement (doi:10.1039/d3cy00637a), 2023-01-01
Supplement: d3cy00637a1.pdf [file d3cy00637a1.pdf]

## Electronic Supplementary Information

### **Large Au@Pd/PdO<sub>x</sub> core-porous shell nanoparticles as efficient ethanol oxidation electrocatalysts**

Junfang Hao,<sup>a</sup> Bin Liu,<sup>a</sup> Mari Takahashi,<sup>b</sup> Shinya Maenosono\*<sup>b</sup> and Jianhui Yang\*<sup>a</sup>

<sup>a</sup> Key Laboratory of Synthetic and Natural Functional Molecule Chemistry of Ministry of Education, Shaanxi Key Laboratory of Physico-Inorganic Chemistry, College of Chemistry & Materials Science, Northwest University, Xi'an 710069, P. R. China.

<sup>b</sup> School of Materials Science, Japan Advanced Institute of Science and Technology, 1-1 Asahidai, Nomi, Ishikawa 923-1292, Japan.

Corresponding Authors:

\*E-mail: shinya@jaist.ac.jp

\*E-mail: jianhui@nwu.edu.cn

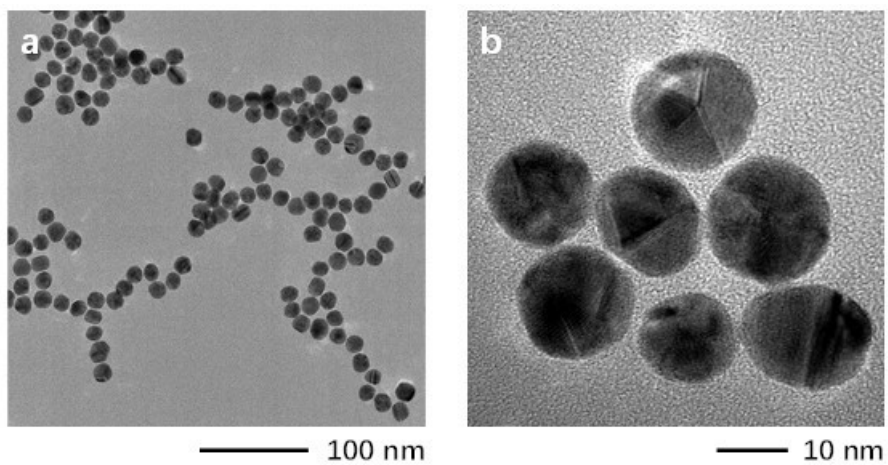

**Fig. S1.** (a) TEM and (b) HR-TEM images of Au seeds synthesized by the citrate-reduction method.

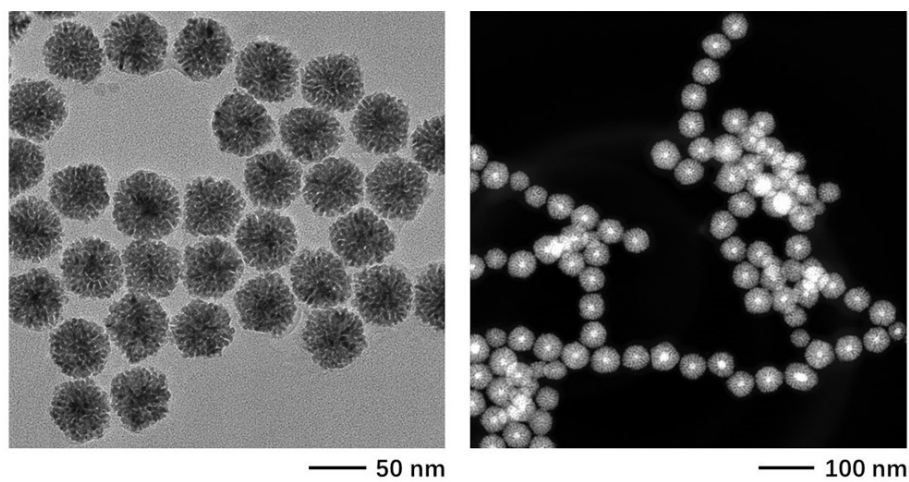

**Fig. S2.** The representative bright-field and dark-field TEM images of Au@Pd core-shell NPs.

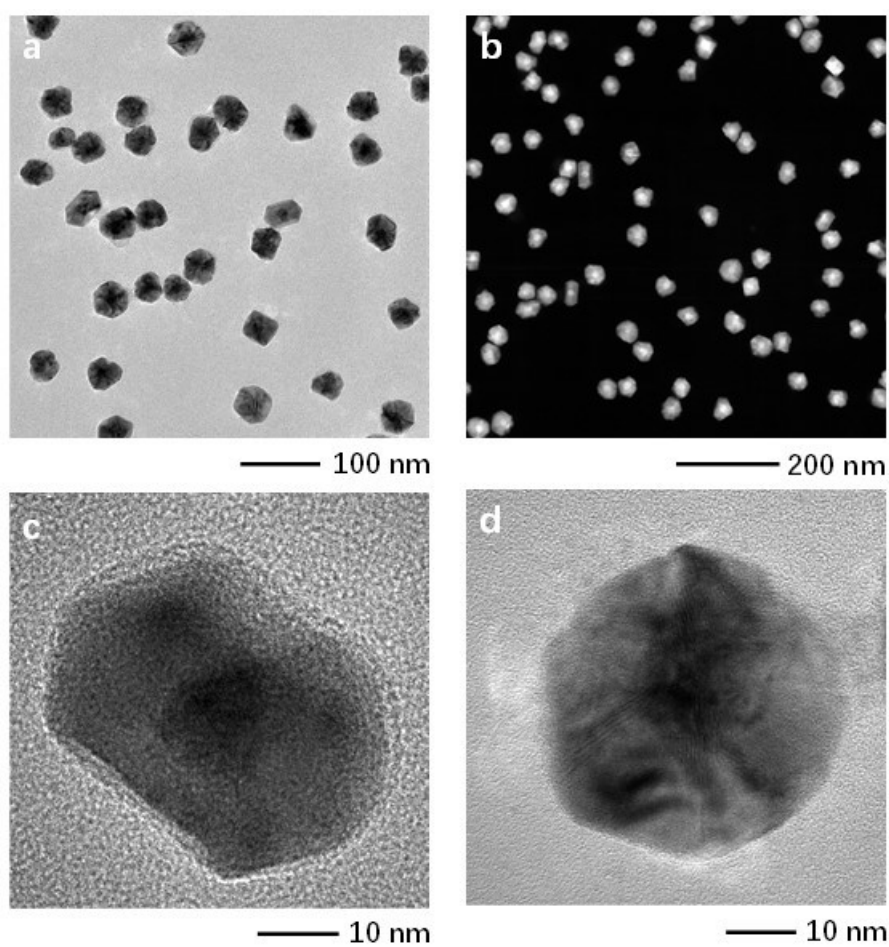

**Fig. S3.** (a) Bright-field, (b) dark-field, and (c, d) high-resolution TEM images of Au@Pd core-shell NPs synthesized in the presence of CTAB.

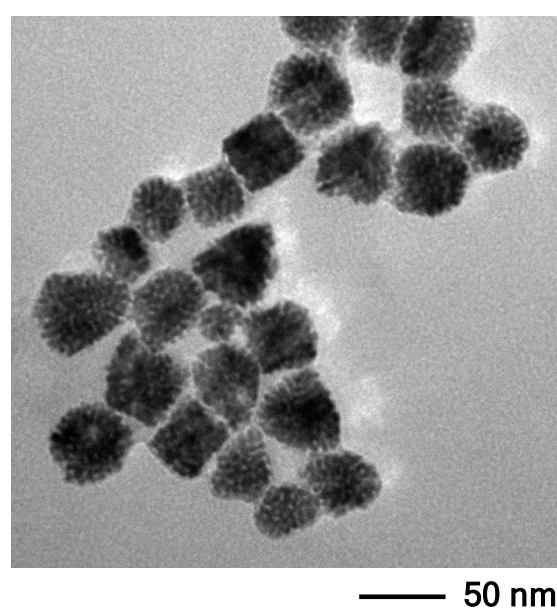

**Fig. S4.** TEM image of porous Pd NPs synthesized in the absence of Au seeds.

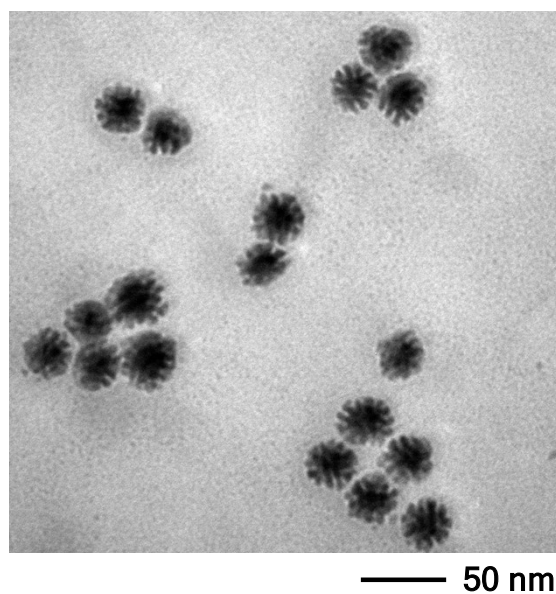

**Fig. S5.** TEM image of Au@Pd core-shell NPs synthesized using HDPC instead of using CTAC.

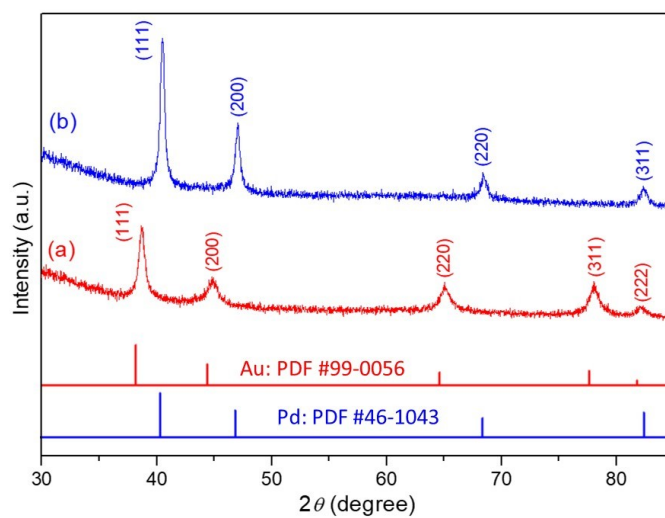

**Fig. S6.** XRD patterns of (a) Au seeds and (b) Pd NPs.

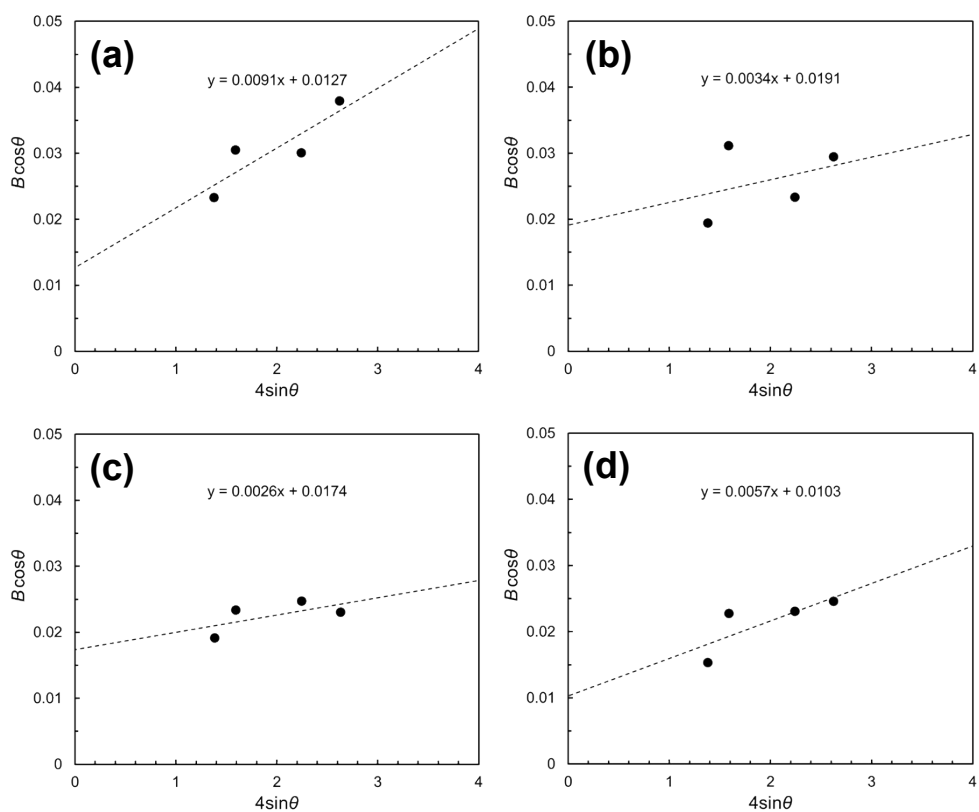

**Fig. S7.** Williamson-Hall analysis of the strain of Pd shell in Au@Pd core-porous shell NPs with different sizes: (a) 23.7 nm, (b) 35.2 nm, (c) 44.2 nm, and (d) 57.5 nm.

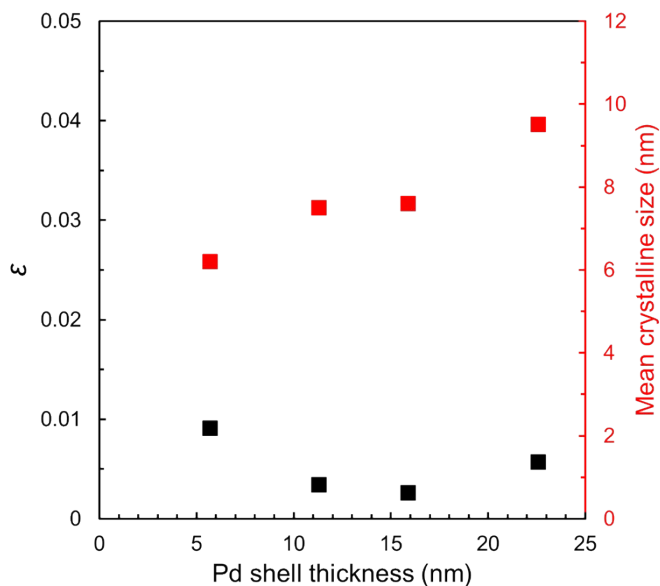

**Fig. S8.** The relation of Pd shell thickness in Au@Pd core-porous shell NPs with strain ( $\epsilon$ ) and mean crystalline size of Pd calculated by the Scherrer formula using the (111) peak of Pd.

**Table S1.** Peak parameters obtained by deconvolution of Pd 3d peaks.

|                                         |                            | 23.7 nm            | 35.2 nm            | 44.2 nm | 57.5 nm |       |
|-----------------------------------------|----------------------------|--------------------|--------------------|---------|---------|-------|
| Pd shell thickness (nm)                 |                            | 5.7                | 11.3               | 15.9    | 22.6    |       |
| Pd <sup>0</sup>                         | 3d <sub>5/2</sub>          | Peak position (eV) | 335.0              | 335.2   | 335.2   | 335.2 |
|                                         |                            | FWHM (eV)          | 1.51               | 1.50    | 1.36    | 1.31  |
|                                         | 3d <sub>3/2</sub>          | Peak position (eV) | 340.2              | 340.5   | 340.5   | 340.5 |
|                                         |                            | FWHM (eV)          | 1.36               | 1.56    | 1.39    | 1.34  |
|                                         | Spin-orbit intensity ratio |                    | 1.49               | 1.49    | 1.53    | 1.49  |
|                                         | Pd <sup>2+</sup><br>(PdO)  | 3d <sub>5/2</sub>  | Peak position (eV) | 336.1   | 336.1   | 336.1 |
| FWHM (eV)                               |                            |                    | 1.64               | 2.5     | 2.5     | 2.5   |
| 3d <sub>3/2</sub>                       |                            | Peak position (eV) | 341.4              | 341.4   | 341.4   | 341.4 |
|                                         |                            | FWHM (eV)          | 1.18               | 2.5     | 2.5     | 2.5   |
| Spin-orbit intensity ratio              |                            | 1.49               | 1.49               | 1.49    | 1.49    |       |
| Pd <sup>4+</sup><br>(PdO <sub>2</sub> ) |                            | 3d <sub>5/2</sub>  | Peak position (eV) | 337.6   | 338.0   | 338.0 |
|                                         | FWHM (eV)                  |                    | 1.60               | 1.64    | 1.93    | 1.79  |
|                                         | 3d <sub>3/2</sub>          | Peak position (eV) | 342.9              | 343.3   | 343.3   | 343.3 |
|                                         |                            | FWHM (eV)          | 1.61               | 1.68    | 1.82    | 1.81  |
|                                         | Spin-orbit intensity ratio |                    | 1.49               | 1.49    | 1.49    | 1.49  |

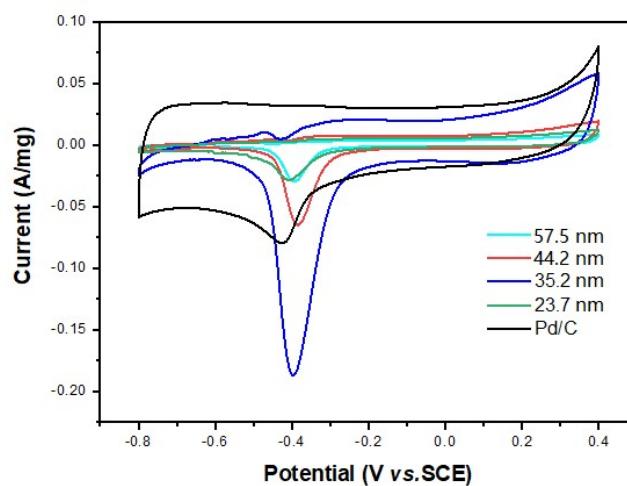**Fig. S9.** CV curves of the Au@Pd/PdO<sub>x</sub> core-porous shell NPs with different sizes and commercial Pd/C in 1 M KOH solution.

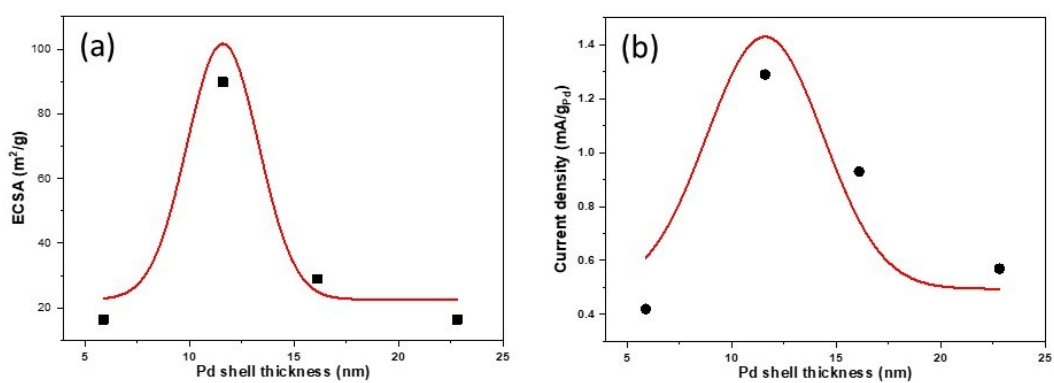

**Fig. S10.** (a) The ECSAs and (b) current density of Au@Pd/PdO<sub>x</sub> core-porous shell NPs to ethanol electrooxidation versus the Pd shell thickness.
